# Supplementary material for: Intercomparison of Fast airborne Ozone Instruments to measure Eddy Covariance Fluxes: Spatial variability in deposition at the ocean surface and evidence for cloud processing
Source: Copernicus journal article supplement (doi:10.5194/amt-2023-198), 2023-10-06
Supplement: Supplementary file 1 [file amt-2023-198-supplement.pdf]

| Date | RF  | Subsection Number | Start Time UTC      | End Time UTC        | starting latitude | starting longitude |
|------|-----|-------------------|---------------------|---------------------|-------------------|--------------------|
| 413  | 3-A | 1                 | 2022-04-13 19:16:43 | 2022-04-13 19:20:13 | 20.1280           | -156.831           |
| 413  |     | 2                 | 2022-04-13 19:24:56 | 2022-04-13 19:31:06 | 20.2879           | -156.971           |
| 413  | 3-B | 1                 | 2022-04-13 20:45:33 | 2022-04-13 20:52:08 | 19.9928           | -156.711           |
| 413  |     | 2                 | 2022-04-13 20:57:53 | 2022-04-13 21:04:06 | 20.2338           | -156.923           |
| 413  |     | 3                 | 2022-04-13 21:14:01 | 2022-04-13 21:16:16 | 20.2172           | -156.853           |
| 413  |     | 4                 | 2022-04-13 21:17:20 | 2022-04-13 21:18:41 | 20.0569           | -156.75            |
| 413  | 3-C | 1                 | 2022-04-13 22:29:35 | 2022-04-13 22:32:36 | 19.9831           | -156.737           |
| 413  |     | 2                 | 2022-04-13 22:38:15 | 2022-04-13 22:44:51 | 20.2377           | -156.926           |
| 413  |     | 3                 | 2022-04-13 22:46:02 | 2022-04-13 22:54:15 | 19.9664           | -156.653           |
| 415  | 4-A | 1                 | 2022-04-15 21:16:20 | 2022-04-15 21:21:46 | 25.9755           | -155.00            |
| 415  |     | 2                 | 2022-04-15 21:22:12 | 2022-04-15 21:25:50 | 26.3548           | -155.00            |
| 416  | 4-B | 1                 | 2022-04-16 00:51:13 | 2022-04-16 00:53:35 | 20.2486           | -152.33            |
| 420  | 5-A | 1                 | 2022-04-20 20:56:06 | 2022-04-20 21:06:01 | 36.6096           | -155.343           |
| 421  | 6-A | 1                 | 2022-04-21 19:39:47 | 2022-04-21 19:44:44 | 59.3743           | -152.177           |
| 422  | 6-B | 1                 | 2022-04-22 02:28:59 | 2022-04-22 02:32:01 | 22.2292           | -155.530           |
| 423  | 7-A | 1                 | 2022-04-23 21:43:30 | 2022-04-23 21:49:20 | 19.9951           | -156.754           |
| 423  |     | 2                 | 2022-04-23 21:52:40 | 2022-04-23 21:57:58 | 20.0846           | -157.041           |
| 423  |     | 3                 | 2022-04-23 22:04:07 | 2022-04-23 22:06:45 | 20.0292           | -156.864           |
| 423  |     | 4                 | 2022-04-23 22:11:24 | 2022-04-23 22:16:08 | 19.9505           | -156.595           |

Table S1. Meteorological conditions during flux legs.

| alt (m) | air speed (m/s) | Ambient T (C) | MBL height (m) | wind (m/s) | qualitative cloudiness | JNO2 (1/s) | JO3 (1/s) | SNPP chlor-a (mg/m <sup>3</sup> ) | SST (C) | NO2 (pptv) | NO (pptv) | CO TDL (ppbv) |
|---------|-----------------|---------------|----------------|------------|------------------------|------------|-----------|-----------------------------------|---------|------------|-----------|---------------|
| 312     | 125             | 21.2          | 800            | 12.0       | moderate low clouds    | 0.00918    | 2.12E-05  | 0.035                             | 21.4    | 55.0       | 24.8      | 94.5          |
| 98.6    | 103             | 23.1          | 800            | 12.0       | moderate low clouds    | 0.00918    | 2.25E-05  | 0.035                             | 21.4    | 42.0       | 21.7      | 94.4          |
| 101     | 107             | 23.3          | 1500           | 11.2       | light clouds           | 0.0101     | 3.72E-05  | 0.035                             | 21.4    | 26.3       | 6.1       | 95            |
| 256     | 104             | 21.8          | 1500           | 12.3       | light clouds           | 0.0102     | 3.88E-05  | 0.035                             | 21.4    | 18.7       | 0         | 94.9          |
| 315     | 103             | 21.1          | 1500           | 13.9       | light clouds           | 0.0111     | 4.42E-05  | 0.035                             | 21.4    | 20.3       | 1.9       | 93.1          |
| 98      | 104             | 23.2          | 1500           | 12.8       | light clouds           | 0.0109     | 4.26E-05  | 0.035                             | 21.4    | 25.2       | 8.5       | 95            |
| 107     | 106             | 23.1          | 1000           | 12.3       | mostly cloudy          | 0.0103     | 4.23E-05  | 0.035                             | 21.4    | 21.4       | 15.4      | 96.3          |
| 889     | 106             | 17.7          | 1000           | 6.8        | mostly cloudy          | 0.011      | 4.74E-05  | 0.035                             | 21.4    | 23.6       | 16.7      | 90            |
| 476     | 107             | 20.9          | 1000           | 3.5        | partly cloudy          | 0.011      | 4.88E-05  | 0.025                             | 24.7    | 25.2       | 18.4      | 93.5          |
| 93.3    | 116             | 21.5          | 1000           | 9.4        | partly cloudy          | 0.0101     | 3.30E-05  | 0.048                             | 18.3    | 30.5       | 7.98      | 117.2         |
| 101     | 120             | 21.4          | 1000           | 8.0        | partly cloudy          | 0.0104     | 3.49E-05  | 0.048                             | 18.3    | 20.3       | 6.11      | 116.5         |
| 98.5    | 115             | 21.7          | 2400           | 10.7       | partly cloudy          | 0.0077     | 2.18E-15  | 0.042                             | 24.1    | NA         | NA        | 106.7         |
| 110     | 117             | 11.9          | 800            | 8.3        | mostly clear           | 0.00996    | 2.81E-05  | 0.112                             | 13.4    | 68.1       | 17.60     | 160           |
| 58      | 108             | 1.5           | 3000           | 5.7        | mostly cloudy          | 0.005      | 3.52E-06  | 1.26                              | 4.9     | 28.1       | 9.42      | 135.3         |
| 116     | 127             | 21.2          | 700            | 9.2        | overcast               | 0.004367   | 5.14E-06  | 0.039                             | 22.2    | 50.5       | 12.9      | 121.4         |
| 116     | 136             | 23.4          | 1700           | 11.7       | mostly sunny           | 0.0107     | 4.76E-05  | 0.0468                            | 18.3    | 9.91       | 10.10     | 100.1         |
| 464     | 119             | 20.3          | 1700           | 11.1       | mostly sunny           | 0.011      | 5.11E-05  | 0.0468                            | 18.3    | 12.9       | 4.25      | 99.8          |
| 778     | 136             | 17.9          | 1700           | 8.0        | mostly sunny           | 0.0113     | 5.38E-05  | 0.0468                            | 24.1    | 27.4       | 2.24      | 133.3         |
| 472     | 126             | 23.4          | 1000           | 3.0        | mostly sunny           | 0.0107     | 4.86E-05  | 0.04765                           | 25.7    | 13         | 0         | 101.6         |

| leg      | Fast O3       |                |                   |       | FAIRO 1       |                |                   |       | FAIRO 2       |                |                   |       |
|----------|---------------|----------------|-------------------|-------|---------------|----------------|-------------------|-------|---------------|----------------|-------------------|-------|
|          | avg.<br>(ppb) | range<br>(ppb) | st. dev.<br>(ppb) | % RSD | avg.<br>(ppb) | range<br>(ppb) | st. dev.<br>(ppb) | % RSD | avg.<br>(ppb) | range<br>(ppb) | st. dev.<br>(ppb) | % RSD |
| RF03-B-4 | 36.6          | 0.9            | 0.40              | 1.1   | 34.4          | 0.7            | 0.35              | 1.0   | 34.5          | 0.8            | 0.38              | 1.1   |
| RF04-B-1 | 24.0          | 1.0            | 0.36              | 1.5   | 21.5          | 0.6            | 0.26              | 1.2   | 21.2          | 1.1            | 0.30              | 1.4   |
| RF07-A-3 | 24.6          | 1.0            | 0.34              | 1.4   | 23.5          | 0.7            | 0.29              | 1.2   | 23.9          | 0.8            | 0.23              | 1.0   |
| RF03-C-1 | 35.8          | 1.2            | 0.43              | 1.2   | 35.1          | 1.1            | 0.38              | 1.1   | 35.0          | 1.6            | 0.45              | 1.3   |
| RF05-A-1 | 53.5          | 3.3            | 0.86              | 1.6   | 53.9          | 1.8            | 0.52              | 1.0   | 53.9          | 2.1            | 0.57              | 1.1   |
| RF04-A-2 | 30.0          | 1.0            | 0.37              | 1.2   | 28.0          | 1.0            | 0.35              | 1.3   | 28.2          | 1.3            | 0.39              | 1.4   |
| RF07-A-4 | 24.0          | 1.6            | 0.42              | 1.8   | 22.8          | 0.9            | 0.30              | 1.3   | 23.1          | 0.9            | 0.22              | 1.0   |
| RF07-A-2 | 23.9          | 1.2            | 0.37              | 1.6   | 23.5          | 1.0            | 0.33              | 1.4   | 23.8          | 0.8            | 0.22              | 0.9   |
| RF03-A-1 | 35.6          | 1.6            | 0.48              | 1.5   | 35.0          | 1.6            | 0.41              | 1.2   | 34.6          | 1.1            | 0.38              | 1.1   |
| RF03-B-3 | 37.0          | 1.7            | 0.44              | 1.2   | 34.7          | 1.6            | 0.44              | 1.3   | 35.0          | 1.8            | 0.44              | 1.3   |
| average  |               |                |                   | 1.4   |               |                |                   | 1.2   |               |                |                   | 1.1   |

Table S2. Summary of instrument precision estimates from low-variability flux legs.

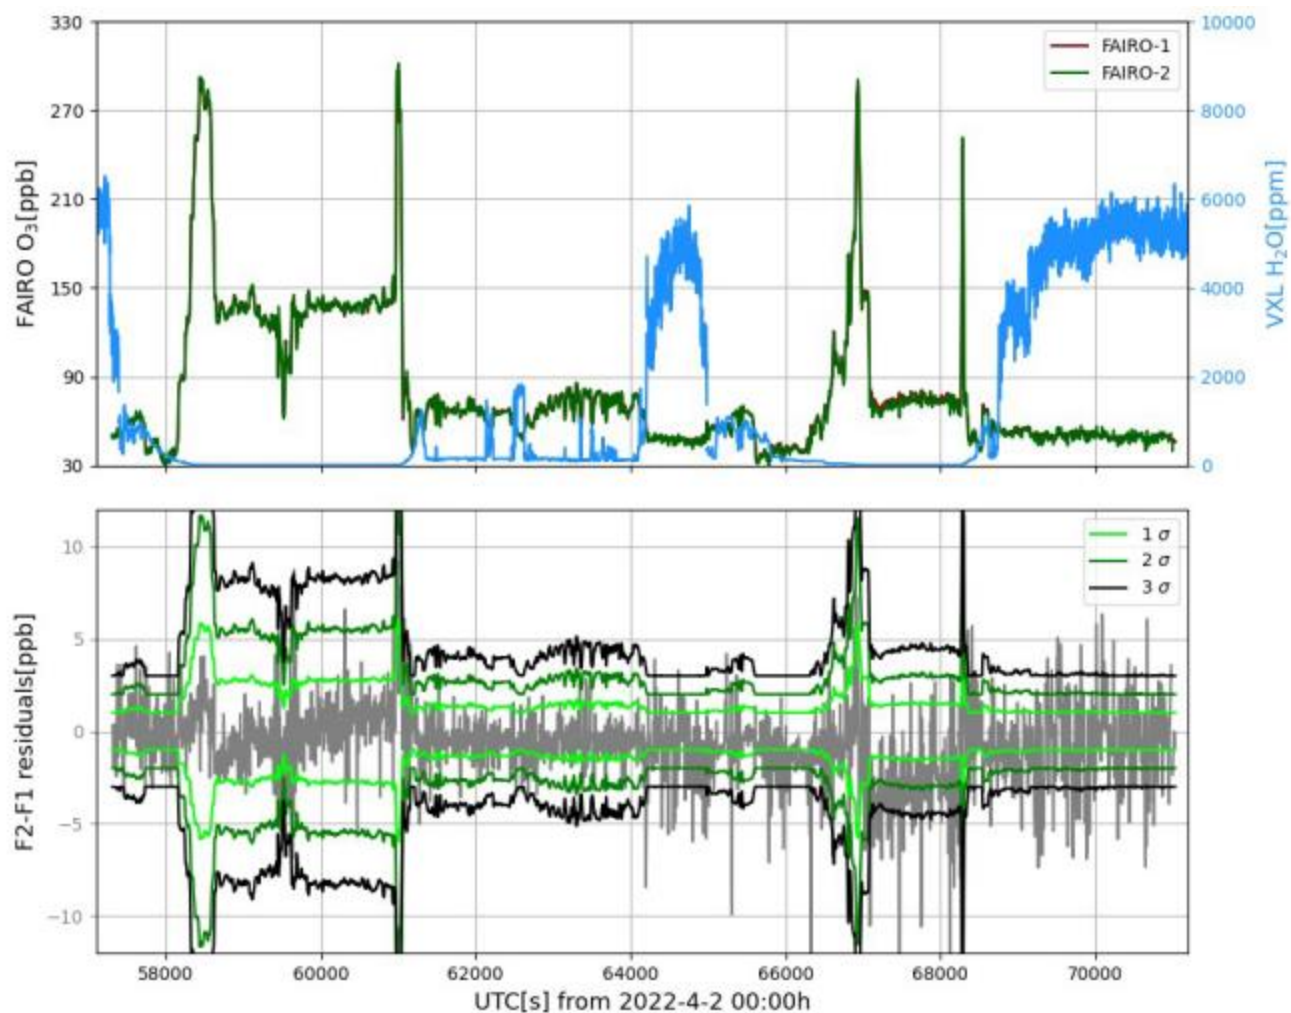

Figure S1: Potential for a small humidity interference of FAIRO uv photometers. At high H<sub>2</sub>O VMR, when considerable RH variability occurs (top panel), a larger variability/noise is observed for O<sub>3</sub> in the difference “FAIRO-1 minus FAIRO-2” (bottom panel), e.g. for RF-01 at 64.000 – 65.000 s or after 69.000 s. This may be due to a (small) H<sub>2</sub>O dependence of the dielectrical constant of air that influences Rayleigh scattering: a rapid increase of humidity leads to a higher H<sub>2</sub>O VMR in the ambient air, corresponding to additional scattering and the retrieved O<sub>3</sub> concentration may be too high; the opposite happens when suddenly dry air is intersected.
